# Supplementary material for: The posttraumatic stress interview for children (KID-PIN): development and validation of a semi-structured interview of PTSD symptoms among displaced children in the Middle East
Source: PeerJ. 2021 Dec 15;9:e12403. doi: 10.7717/peerj.12403 (PMC8684325; doi:10.7717/peerj.12403)
Supplement: Supplemental Information 1 [file peerj-09-12403-s001.xlsx]

## Sheet: Validation sample _86
Validation sample					Full sample
WAECsum	KidPinSum	SMFQsum	CAPS_CA_sum		WAECSUM	KIDPINSUM	SMFQSUM
6	34	6	25		5	36	2
13	63	10	39		5	6	0
2	49	0	31		8	18	4
6	40	11	49		8	0	2
8	29	10	28		3	20	4
20	28	6	41		8	2	0
11	70	22	57		4	19	4
4	54	10	28		4	7	0
5	0	1	24		3	7	2
5	36	2	8		0	0	0
5	2	1	8		12	31	7
4	34	6	21		0	2	1
4	40	3	18		1	6	0
15	57	16	24		5	15	6
5	26	9	16		1	11	6
9	25	6	10		0	0	1
10	24	3	26		0	0	1
7	4	0	16		9	16	4
5	31	2	11		0	0	0
1	22	5	28		16	51	7
3	19	0	4		5	31	8
3	36	2	11		5	30	7
8	72	14	18		3	0	0
18	65	15	19		7	38	15
7	26	1	5		2	29	8
2	29	8	4		3	3	2
6	18	4	3		1	1	1
3	33	7	2		7	14	7
7	23	4	0		7	0	2
8	52	14	18		6	18	4
14	41	12	25		3	2	2
2	0	15	14		4	13	14
5	23	9	19		4	35	4
5	0	0	14		3	21	5
8	24	14	18		2	0	12
4	7	0	0		14	48	13
3	2	2	0		3	2	1
6	15	8	0		3	5	3
5	36	15	0		1	0	0
4	0	1	0		5	2	1
4	16	6	2		5	27	6
7	26	3	0		3	33	7
1	28	1	0		7	23	4
1	16	0	0		8	8	4
8	59	18	0		6	15	8
1	0	9	0		7	24	10
6	7	0	0		17	29	10
4	32	3	0		1	47	2
6	30	12	0		4	34	6
4	22	0	0		4	40	3
6	22	6	0		5	36	15
4	0	0	0		2	0	0
4	35	0	0		4	0	1
7	34	5	0		6	0	2
4	32	1	3		5	0	2
3	29	1	0		14	0	0
2	0	0	18		9	36	6
10	67	21	0		0	0	0
9	17	6	2		15	57	16
6	38	18	0		3	35	6
14	31	6	1		6	34	6
2	0	0	0		7	37	2
1	0	0	0		5	26	9
2	0	1	7		4	16	6
2	12	5	1		5	12	7
2	0	4	0		5	30	16
1	0	0	0		1	1	0
8	9	1	2		7	26	3
1	0	0	0		3	32	6
8	35	9	0		9	25	6
2	43	16	5		2	0	1
8	0	16	9		1	0	0
1	0	0	0		5	14	0
1	0	0	1		2	6	5
4	15	0	0		4	0	3
1	0	2	0		1	0	0
9	52	8	9		5	0	1
5	27	0	9		1	28	1
5	20	1	0		2	0	2
4	8	2	9		1	0	2
9	19	1	5		11	18	3
2	0	0	0		1	16	0
2	0	0	0		8	59	18
2	0	0	0		13	31	5
2	0	2	0		10	24	3
5	11	0	4		19	9	4
					1	0	9
					6	7	0
					3	5	2
					4	32	3
					6	30	12
					4	22	0
					6	22	6
					4	0	0
					13	63	10
					7	4	0
					7	56	25
					6	0	8
					4	27	3
					8	52	14
					4	35	0
					2	49	0
					2	0	12
					4	0	0
					0	0	1
					0	0	0
					0	0	0
					3	0	1
					2	0	0
					2	0	0
					1	18	11
					5	20	2
					6	40	11
					5	31	2
					8	29	10
					7	34	5
					5	23	1
					5	20	9
					7	14	5
					11	23	7
					11	16	10
					3	0	0
					1	0	0
					0	0	0
					0	0	1
					1	0	0
					10	0	1
					1	0	1
					1	0	0
					4	6	4
					4	32	1
					3	29	1
					14	41	12
					4	0	4
					3	0	0
					2	0	0
					7	0	0
					3	0	0
					4	0	0
					4	0	1
					10	12	2
					20	28	6
					10	67	21
					0	0	0
					5	13	3
					9	17	6
					3	0	5
					5	0	1
					4	0	1
					1	0	6
					1	0	0
					5	0	1
					4	0	0
					3	3	11
					1	0	0
					2	0	0
					2	0	5
					2	0	0
					5	2	1
					1	0	0
					0	0	0
					1	0	6
					17	44	11
					6	38	18
					9	18	5
					5	36	3
					3	31	3
					2	0	0
					7	0	0
					4	53	16
					0	0	0
					2	0	0
					10	52	18
					7	10	1
					4	0	0
					14	31	6
					9	20	3
					1	0	0
					11	12	2
					3	0	0
					12	31	21
					4	68	21
					1	0	0
					5	0	0
					0	0	0
					1	0	0
					5	0	20
					11	70	22
					4	54	10
					4	0	8
					2	0	0
					1	0	0
					2	0	1
					2	12	5
					2	0	15
					2	0	4
					1	0	0
					8	9	1
					1	0	0
					1	22	5
					5	23	9
					6	0	0
					7	19	1
					7	17	0
					2	3	4
					5	13	2
					4	10	1
					16	67	20
					8	35	9
					7	58	10
					2	43	16
					1	26	0
					3	36	2
					8	72	14
					0	0	0
					4	10	2
					1	0	4
					2	0	0
					1	0	0
					7	1	0
					18	65	15
					3	19	0
					3	0	0
					0	0	0
					8	0	16
					1	0	0
					1	0	0
					0	0	0
					1	0	0
					1	0	6
					1	0	0
					4	0	1
					2	18	2
					4	8	0
					5	0	0
					1	0	1
					11	56	12
					4	15	0
					5	0	0
					1	0	2
					1	0	0
					4	0	0
					9	52	8
					7	26	1
					1	0	0
					3	0	0
					4	0	0
					1	0	0
					8	49	13
					2	0	0
					1	1	0
					5	27	0
					5	0	2
					4	0	0
					1	0	9
					1	0	0
					3	0	0
					2	0	0
					1	0	0
					1	0	0
					5	0	17
					0	0	0
					1	0	0
					9	0	8
					0	0	0
					5	20	1
					10	60	8
					4	8	2
					8	24	14
					0	0	0
					1	0	0
					0	0	0
					0	0	0
					4	3	0
					0	0	0
					10	52	10
					8	17	1
					7	20	3
					1	0	0
					9	19	1
					1	0	0
					1	0	0
					5	0	0
					1	0	0
					9	0	0
					0	0	4
					5	10	1
					3	0	2
					1	0	0
					1	0	0
					11	17	1
					5	8	0
					5	19	4
					7	30	3
					11	48	12
					4	0	0
					2	0	0
					2	0	0
					2	0	0
					2	0	2
					4	0	0
					1	0	0
					5	23	4
					1	4	0
					9	35	0
					1	27	3
					3	0	0
					7	7	0
					3	11	0
					0	0	0
					0	0	3
					9	55	18
					4	13	3
					8	47	4
					1	0	0
					1	0	0
					5	0	1
					1	1	0
					1	0	0
					1	2	0
					4	0	4
					5	11	0
					1	0	0
					8	0	0
					2	0	0
					7	8	1
					1	0	1
					1	0	2
					6	0	10
					12	44	8
					1	0	0
					13	58	12
